# Supplementary material for: An ER Complex of ODR-4 and ODR-8/Ufm1 Specific Protease 2 Promotes GPCR Maturation by a Ufm1-Independent Mechanism
Source: PubMed Central journal article supplement (PMC3945108; doi:10.1371/journal.pgen.1004082), 2014-03-06
Supplement: pgen.1004082.s009.pdf [file pgen.1004082.s009.pdf]

Sequence of the pEXPRESSION vector used for odr-8 mutant phenotype rescue:

CAGGAAACAGCTATGACCATGATTACGCCAAGCTATcaactttGTATAGAAAA  
GTTGlcgcgtgaccacagttgttcataaaagatttcagcaacgaaagagaagaaaaaggacataatctgagaaataa  
agctgaaaaactactgaaataattgcgggggatttacgaaagaagaatcgtccatggtgcaaatgtcagtgccgc  
gcggtttaaccgagtcacaacataaafatggagacggagacacaatgcaaacgccttcgctggtctttttgttttttctt  
gtaacttaaatggaaacctggagtgattggatcatttaattgttttcagcttgtaagctccgctttgtacgcgattgatga  
aataaaacatgttataattcaagttatataccaaaataaggttttcagatgtcagagtcacgtcaaacctgaatccagatggaa  
ctgagttccagaccctaatgacgtgccaccaccatcggaagatcaattgactgaagaggtatgctgaaatattacatttga  
aaaattattaacaatccatgttcaggatctatccggatgcgtctctgacaatcaatcgaaaaaaggacgtaagttttttc  
atcgttgaaagttttgaaagataatttttaaaatatttaatttttttagtttcagttgttggtggtgcaagtgcagacc  
gagcagtcctatatactcgcagattcgactcaaatttgatgagcatgttgagatgatgccgagttggattatgagctg  
gaacaagctcgaagcaacagaagatggtgcagtggtgaacaatctgtttgtggagggtaccattcggaaagaaaag  
agcagatgacttcgccaatgccaatacaggtttctaaaactccagttcagatgaactgatatactataattaca  
gtaacagtgctcaaatggctacaatctggcgattcctccacgcaaccccgctgctgagcgattctgatgaagaatggaag  
aaagcgattcgcactccaccattatctcatcggtagcctcactttcaaaagagtcgcaggaagacgatccaacacaatt  
cgtgctgtcaacctgattttgatgctgtgagctgtgccatcacgaattcaatcatactgatggatgaggtcggctttga  
gcaagcgaaagatcacaactcaaaaaattatcagaccatgaacaagtgagttctatattttgtgtgtaattgtgaa  
tatttcaacttttaagaacggcgctgattcaaggaattctgcacgttctctcctgcaatgacagcgatgaacacgtgac  
ttccatggctcccggaggagaattccgtgctgctcatcgtgcagcagttgcaactgaggttgagtattaaaaagttttatta  
caaagtaactattcagaattgtcgtgtagttctcggtgatcctattcaagttacactcaacgtgcaactggtctctctcca  
ctggcaaaaaattcgttctctccacgttgcaatttcacatcgtgagaagataactgcagaagaggtatttaattattcaacc  
tttccaaaaatattccaaaatfataggtggaacgatgcaagcaacgtgacctctggagcaactctcggcgagatggctga  
tgatttccacaactatcccaatctttgtggaagagcgtgatgctcatgacgeatgctttgcatatgctctacaccggaa  
ctcagtcgaaaaacgtgcacaatggcttcgtggaacaactgggcaacaattcaaccgttgacagttgtgtcgtcgttgaa  
tcggacatactccaggaattgtaacaatggaatacaaatatfgatttgatccactatgaacatccaccaccaagcctcg  
gaacaaggtaaattaatctgaagtatttaattcttcattctttatttccaggtttctccactggcgctcctgattgtctggg  
gatctttgggataattggcttctcgtggaggacgtgctatctcaatcgtgttagcacattcatagagctcgttggttaggtgga  
aattttgtttaaatttagtttgggaatgtgaaattaaacgatgaaattaaacgtgaattttgcaaaatcaaggctgcacaga  
gagaggcagcgcgtagtttgcaagcctgtggcattgtttccaccgtttttgggtggttttttcgataagttcactttactg  
gttcaactatttttcaatgaaaatgttacctaattcaattctcacaatgatgaggaaattcatgttagattgttgaaaaacga  
agtatttcacaatcttatgggaattgaattagatacataatattttattcaaaaaaaagaaggaaaaaccgtaccacaggg  
atgagaaattacgcgaattaccaactccccattcaagaatgaaataatagcaaacctaattctcatttctgctctcccgctt  
ctctcgttattagcttttctggtateacctgctccgcacaagttaccatgacaaccaaccactaactcgtatacttttcagaa  
caactcattgatgaaagcgggcacaacagcatagcagccgtctacattegatctacaggcgtttccatcgttattttgttcttcc  
taaatgtttatgtctaattatggacttttaatecgttttctgtaatgtgatacattctagggtgtagataggtgagaattgaa  
acaaaattttcttcccaatttttctaaactatcctttctgttaaagtccecaaaacaattgcaalltatttattagtcaccaccgct  
tcttccgttatcagattgatttctcgtttctttgtaaaatacaaaataattaaattattcctctctattgcaaaatcccctt  
acaagtccecatattcagctcgtggtcgtataaatgacacattcaatatttctctcgtgattcgtggtaatatccataaacta  
ttattatctttgaaaggtgattggaagagaagCAAGTTTGTACAAAAAAGCAGGCTAAGAatga  
cgaatttcaactgtctactaattggaccaactcagatggctccacaatcaacacctccacctctgtgaatgaattgtggt  
ttattgatgcgcaggcaatgttcaggtaattatgtggaaatgagctatgaaagtttaagaagtctgaaattatcagatttct  
atactagttgaaaaacggaaaaaacgaataaatctgaaaacactccaaaatcagcttgcgagataaaagatttcacac  
gaaatatttaagaattacgccaacctccgctcgtctccaaatccaatgccaacgaaattaatacacaattggcggattcgt  
ttcggacgtaaagctcggaaacaggttatccatgtgctattcgcctacgctgaagatctgactgaatcgaacagacaattctt  
ggagagctctctgctgctggttaattaatggaataatattataaaaactgagatttaattcagatattgaactgggtgaaact  
gaaatattgatggacaatcacagattctctggcgggcagttcaccctcagctgacatctcgaatgcttgaaaatcgaagat  
cagcgaatttttgatagaaatgtgatgtcaacaatgaacatgttcttatggaaggagctagttgtcagcagagtagcttcc  
cataagatctttaaattattgaaataaaaacggctcgttcagggttgatacagatggctcactcagcaggtcgtgaaacaaga  
agatgcaaatctgctgccgaacgtcttcaatggcttctttcgtttcacatatctaaacgtgaacacgggttggtgatccgt

gagcagaagccagaagctgctcaacagaagtatcttgataaattctcgaaaggcgtgtaccatataaggttgaaact  
gtctaaattaatgattgacggaattcaggatgtatcgaattcactgccatgcaatctcactagggatacatctaatgat  
acggaagatcaaaagctggtccaacagttaagggtaccaagggtaaaagaatttgtattttataaagatattaaattcgtaat  
tagatacaaacattcactcggctcgtcacaattggtgaggtagtttcccagcgttcttggagattctcactggattgtac  
aaacgatcacgtgaggcattcaatagaagagctaacaatacaatgatggttacagcaatggaataagagctggggtaaaa  
attgaaatgtaatatttttatatcgattgatatctgcagcgcggagtaacaacgaccacatctgcaactatctccacctgga  
tgggttctctactctccaactccaactaaatggacggacaatgaacaagatctatagaaagcgttcaactctataa  
aaattcaattttctaggaattaccgtattcgtctcacaagttgtcaactgccatcatctaaagcagttctcgttctcaag  
cgttggctctcactcagagagtgtcgttggaccaacaagaagctcattcagagccacattgtctatacaaaattgtatgt  
taaaaatggagatccgaaattgaggcattgcttggaccgcaaaactacagaattcgtaatgagacatcaatttggca  
acttgacagaccggaaattgagggaattgaaatcaatcaagttgtcaaaattcgagattttagctgaaaaaaaaaccgatta  
acttttctttgagaaatttcagaacgttccataacgaaatgcggaagtttggcaatttgggtctaaacaagcaagactca  
gaattaatttcagatcaaccagttggtgaataaccactgtaaatggccgtacaattatcatcattacatcaagatggaatt  
gatgatagtgaggatgggatgtgcatactgtagttccaaactatctggagttggttcatttgaatggatatactgataaacctgt  
gccaagtcacgggaaattcagcaggttggttaagcagattcaattgaagtgtttatttgtgcaggcgttgtgatattc  
aagacaagcaagcgaagttgtggtcacgacagtggattgtagtactgaaatcagtttgtctcaatgagctactcagta  
agtagttgtgagtaattgtatttaatgtaaacattcagagttagaatgccgttccatcgtaccaactcgggcgcagaagtt  
gtcgaagagttcgtgaactgtcgcacatttgaacatctggaactcctgttatgatcggaggaaatgcttgcacatact  
attctggagtcgattcaatgataccactggagagactaagtgagtttttttcaaattggaagtatagcaacacaataatt  
ccagattctcgttctgatctcattacactggctccgaagatatcaaaacaatcacttcaaaggatggtgtgcatggaaac  
cagcagcttctggagcaaaagatcatttctacaatatggtcctcctcaaccgctagcgtatcttggagcttggattgatta  
ccatgcctatgaaaaacaatgcattatatactaaattattccaacctctaccatttacattgtaattctctatatttttaacct  
ggattagctcttctcgtctgtgattaatttatttctctatagagaaatgcttctatagcccaaccaacgtttttgggaataaaa  
aattggtcaaaagttgagtacaagtcagcatggACCCAGCTTTCTTGTACAAAGTGGGTCCA  
ATTACTCTTCAACATCCCTACATGCTCTTTCTCCCTGTGCTCCCACCCCTA  
TTTTTGTTATTATCAAAAAACTTCTCTTAATTTCTTTGTTTTTATGCTTCTT  
TAAGTCACCTCTAACAATGAAATTGTGTAGATTCAAAAATAGAATTAATT  
CGTAATAAAAAGTCGAAAAAAATTGTGCTCCCTCCCCCATTAATAATAA  
TTCTATCCCAAAATCTACACAATGTTCTGTGTACACTTCTTATGTTTTTAC  
TTCTGATAAATTTTTTTGAAACATCATAGAAAAAACCGCACACAAAATAC  
CTTATCATATGTTACGTTTCAGTTTATGACCGCAATTTTTATTTCTTCGCAC  
GTCTGGGCCTCTCATGACGTCAAATCATGCTCATCGTGAAAAAGTTTTGGA  
GTATTTTTGGAATTTTTCAATCAAGTGAAAGTTTATGAAATTAATTTTCTT  
GCTTTTGCTTTTTGGGGTTTTCCCTATTGTTTGTCAAGATTCGAGGACGGC  
GTTTTTCTTGCTAAAATCACAAAGTATTGATGAGCACGATGCAAGAAAGAT  
CGGAAGAAGTTTTGGGTTTGGAGCTCAGTGGAAGGTGAGTAGAAGTTGAT  
AATTTGAAAGTGGAGTAGTGTCTATGGGGTTTTTGCCTTAAATGACAGAA  
TACATTCCCAATATACCAAACATAACTGTTTCACTTTattatacatagttgATAAT  
TCACTGGCCGTCGTTTTACAACGTCGTGACTGGGAAAACCCTGGCGTTACC  
CACTTAATCGCCTTGACGACATCCCCCTTTCGCCAGCTGGCGTAATAGC  
GAAGAGGCCCGCACCGATCGCCCTTCCAACAGTTGCGCAGCCTGAATGG  
CGAATGGCGCCTGATGCGGTATTTTCTCCTTACGCATCTGTGCGGTATTT  
ACACCGCATATGGTGCCTCTCAGTACAATCTGCTCTGATGCCGCATAGTT  
AAGCCAGCCCCGACACCCGCCAACACCCGCTGACGCGCCCTGACGGGCTT  
GTCTGCTCCCGCAatcgegttacagacaagetgtgaccgtctccgggagctgcatgtgcagaggtttaccg  
tcatcaccgaaacgcgcgagacgaaaggcctcgtgatagcctattttataggttaagtcaTGATAATAATG  
GTTTCTTAGACGTCAGGTGGCACTTTTCGGGGAAATGTGCGCGGAACCCC  
TATTTGTTTATTTTTCTAAATACATTCAAATATGTATCCGCTCATGAGACA  
ATAACCCTGATAAATGCTTCAATAATATTGAAAAAGGAAGAGTATGAGTA  
TTCAACATTTCCGTGTCGCCCTTATTCCCTTTTTTGCGGCATTGTGCCTTCC

TGTTTTTGCTCACCCAGAAACGCTGGTGAAAGTAAAAGATGCTGAAGATC  
AGTTGGGTGCACGAGTGGGTTACATCGAACTGGATCTCAACAGCGGTAAG  
ATCCTTGAGAGTTTTCGCCCCGAAGAACGTTTTCCAATGATGAGCACTTTT  
AAAGTTCTGCTATGTGGCGCGGTATTATCCCGTATTGACGCCGGGCAAGA  
GCAACTCGGTGCGCCGATACACTATTCTCAGAATGACTTGGTTGAGTACTC  
ACCAGTCACAGAAAAGCATCTTACGGATGGCATGACAGTAAGAGAATTAT  
GCAGTGCTGCCATAACCATGAGTGATAACACTGCGGCCAACTTACTTCTG  
ACAACGATCGGAGGACCGAAGGAGCTAACCGCTTTTTTGCACAACATGGG  
GGATCATGTAACTCGCCTTGATCGTTGGGAACCGGAGCTGAATGAAGCCA  
TACCAAACGACGAGCGTGACACCACGATGCCTGTAGCAATGGCAACAAC  
GTTGCGCAAATACTGCGGAACTACTTACTCTAGCTTCCC GGCAACA  
ATTAATAGACTGGATGGAGGCGGATAAAGTTGCAGGACCACTTCTGCGCT  
CGGCCCTCCGGCTGGCTGGTTTATTGCTGATAAATCTGGAGCCGGTGAGC  
GTGGGTCTCGCGGTATCATTGCAGCACTGGGGCCAGATGGTAAGCCCTCC  
CGTATCGTAGTTATCTACACGACGGGGAGTCAGGCAACTATGGATGAACG  
AAATAGACAGATCGCTGAGATAGGTGCCTCACTGATTAAGCATTGGTAAC  
TGTCAGACCAAGTTTACTCATATATACTTTAGATTGATTTAAA ACTTCATT  
TTAATTTAAAAGGATCTAGGTGAAGATCCTTTTTGATAATCTCATGACCA  
AAATCCCTTAACGTGAGTTTTTCGTTCCACTGAGCGTCAGACCCCGTAGAA  
AAGATCAAAGGATCTTCTTGAGATCCTTTTTTTCTGCGCGTAATCTGCTGC  
TTGCAAACAAAAAACCACCGCTACCAGCGGTGGTTTGTGGCCGGATCA  
AGAGCTACCAACTTTTTTCCGAAGGTA ACTGGCTTCAGCAGAGCGCAGA  
TACCAAATACTGTCCTTCTAGTGTAGCCGTAGTTAGGCCACCACTTCAAGA  
ACTCTGTAGCACCGCCTACATACCTCGCTCTGCTAATCCTGTTACCAGTGG  
CTGCTGCCAGTGGCGATAAGTCGTGTCTTACCGGGTTGGACTCAAGACGA  
TAGTTACCGGATAAGGCGCAGCGGTGCGGGCTGAACGGGGGGTTCGTGCAC  
ACAGCCCAGCTTGGAGCGAACGACCTACACCGAACTGAGATACCTACAGC  
GTGAGCTATGAGAAAGCGCCACGCTTCCCGAAGGGAGAAAGGCGGACAG  
GTATCCGGTAAGCGGCAGGGTCGGAACAGGAGAGCGCACGAGGGAGCTT  
CCAGGGGGAAACGCCTGGTATCTTTATAGTCCTGTGCGGGTTTCGCCACCTC  
TGACTTGAGCGTCGATTTTTGTGATGCTCGTCAGGGGGGCGGAGCCTATG  
GAAAAACGCCAGCAACGCGGCCTTTTTACGGTTCCTGGTCTTTTGCTGGCC  
TTTTGCTCACATGTTCTTTCCTGCGTTATCCCCTGATTCTGTGGATAACCGT  
ATTACCGCCTTTGAGTGAGCTGATACCAGCGGATAACAATTT CACA

Green: *podr-8*

Yellow: *odr-8* genomic DNA sequence

Cyan: *odr-8* 3'UTR

Grey: *unc-54* 3'UTR
